# Supplementary material for: Nacre-like composite films based on mussel-inspired ‘glue’ and nanoclay
Source: Royal Society of Chemistry journal article supplement (doi:10.1039/c3ra45793a), 2013-11-14
Supplement: c3ra45793a.pdf [file c3ra45793a.pdf]

## Electronic Supplementary Information

### **Nacre-Like Composite Films Based on Mussle-Inspired ‘Glue’ and Nanoclay**

Shu Huang, Si Lei Phua, Wanshuang Liu, Guoqiang Ding, and Xuehong Lu \*

School of Materials Science and Engineering, Nanyang Technological University, 50  
Nanyang Avenue, Singapore 639798

\* To whom correspondence should be addressed. E-mail: [asxhlu@ntu.edu.sg](mailto:asxhlu@ntu.edu.sg); Tel. No.  
+65- 6790 4585; Fax No. +65- 6790 9081

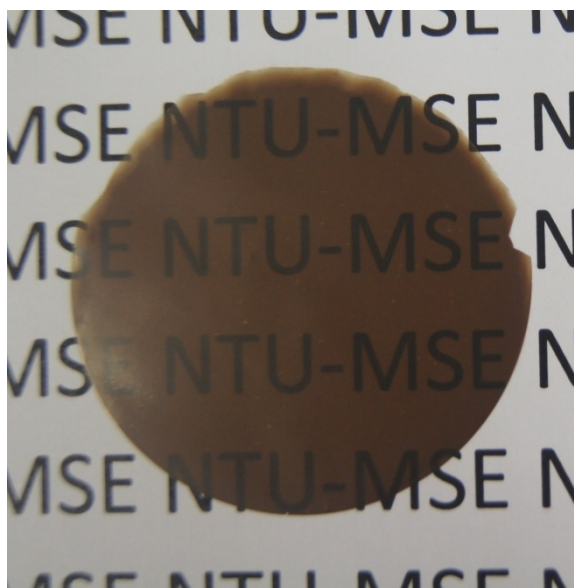

**Fig. S1** Photograph of a semitransparent D-clay film with a thickness of 7 μm.

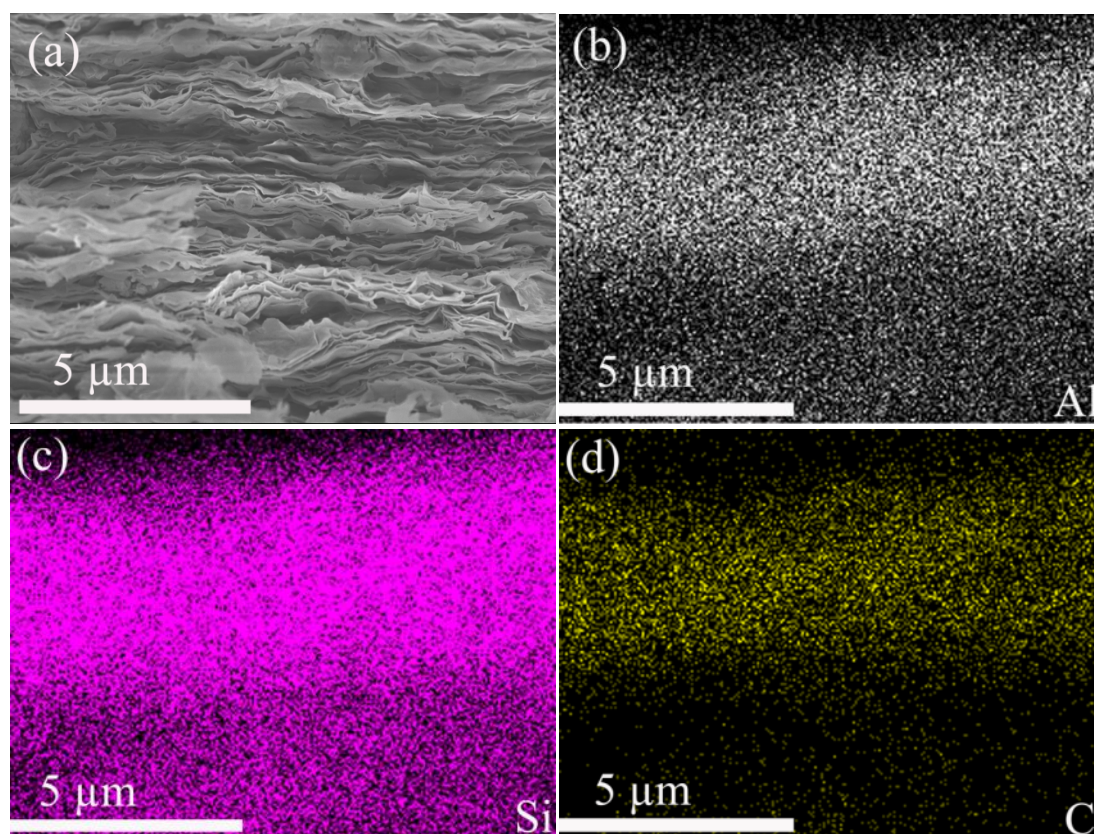

**Fig. S2** (a) Cross-section FESEM image of D-clay film, and (b-d) the corresponding EDX elemental mappings of Al, Si and C, respectively.

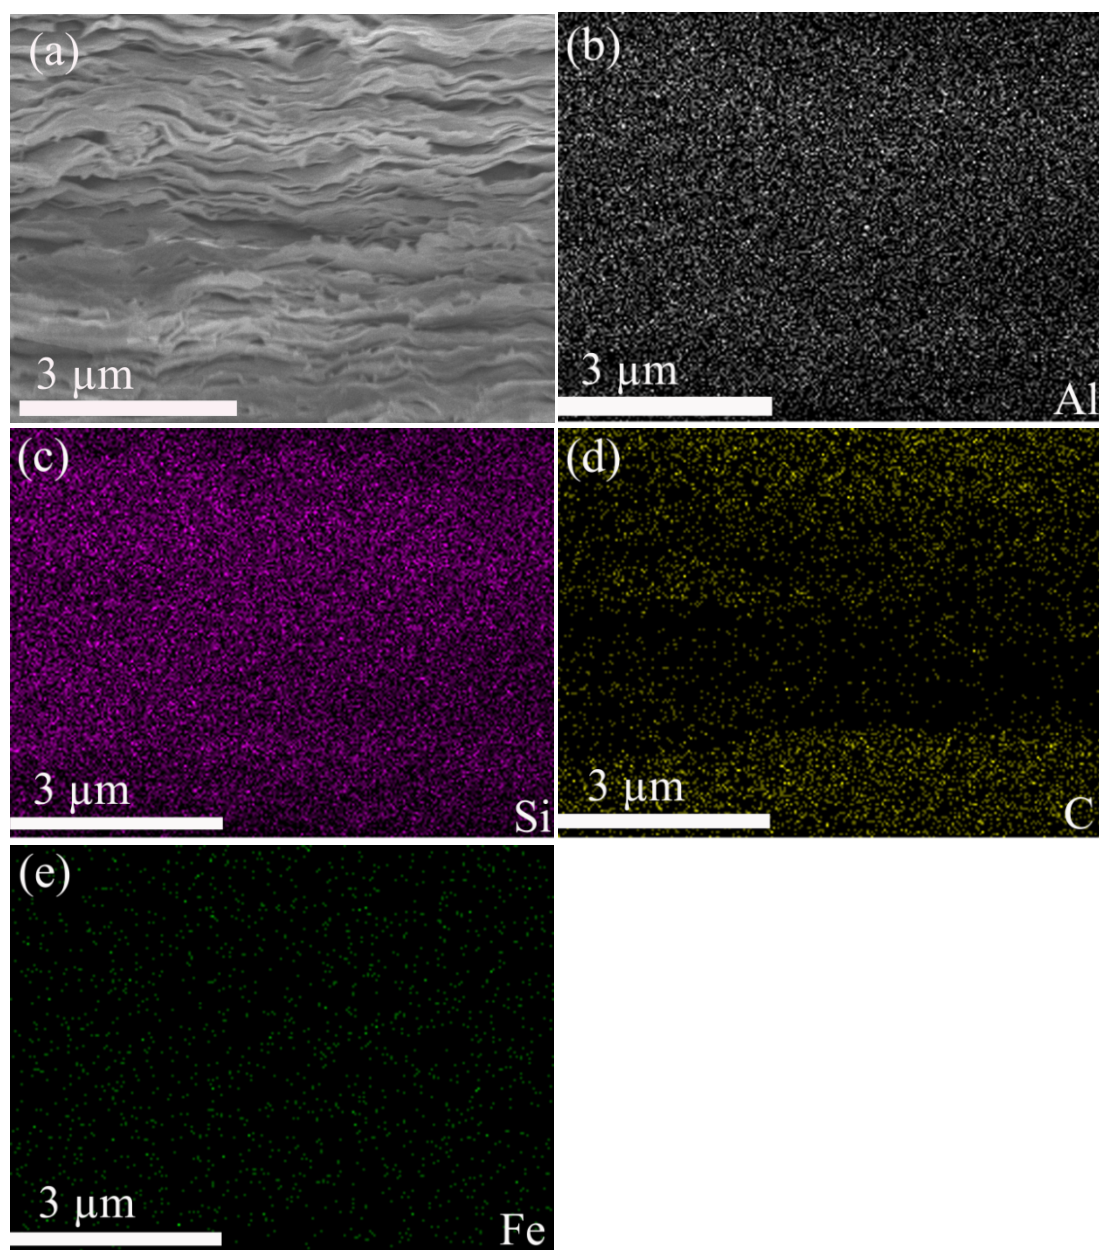

**Fig. S3** (a) Cross-section FESEM image of D-clay/Fe<sup>3+</sup> film, and (b-e) the corresponding EDX elemental mappings of Al, Si and C, Fe, respectively.

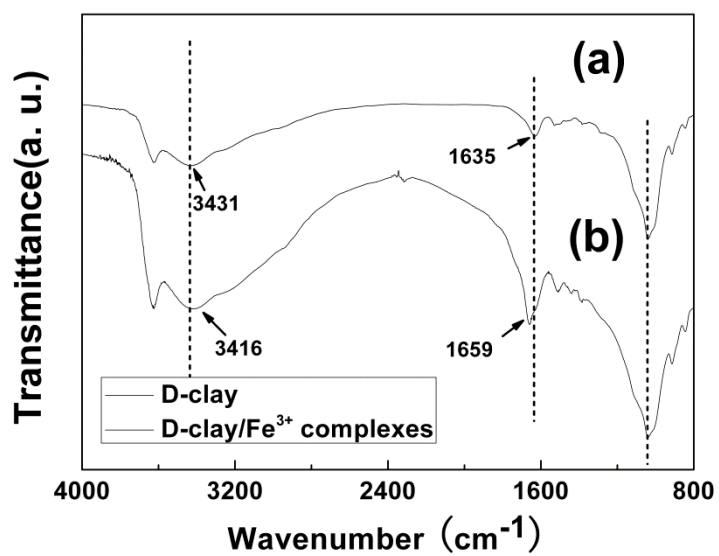

Fig. S4. FTIR spectra of (a) D-clay, (b) D-clay/Fe<sup>3+</sup> complex.

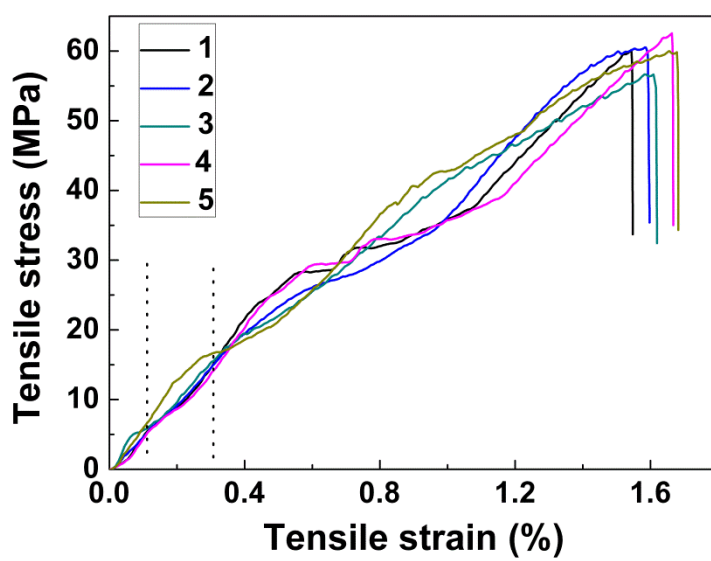

Fig. S5 Five representative tensile curves for D-clay film samples.



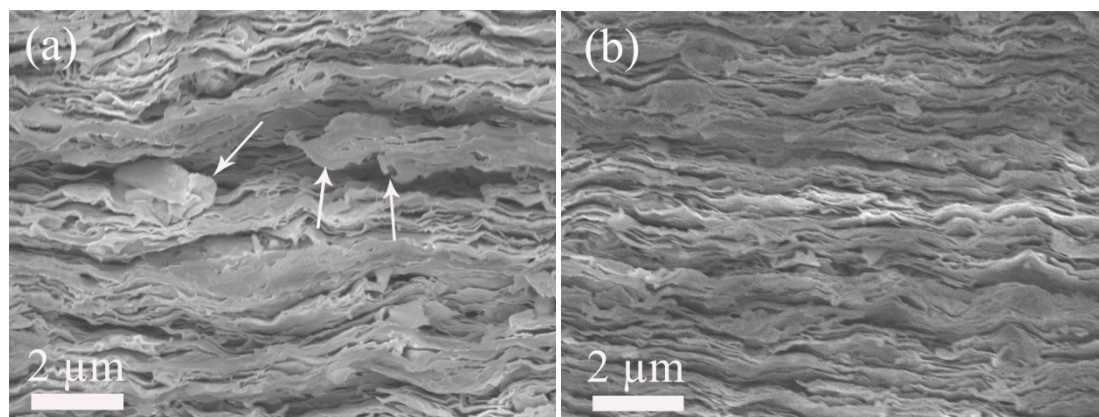

**Fig. S6** SEM fractographs of fractured (a) D-clay film (b) D-clay/Fe<sup>3+</sup> film.

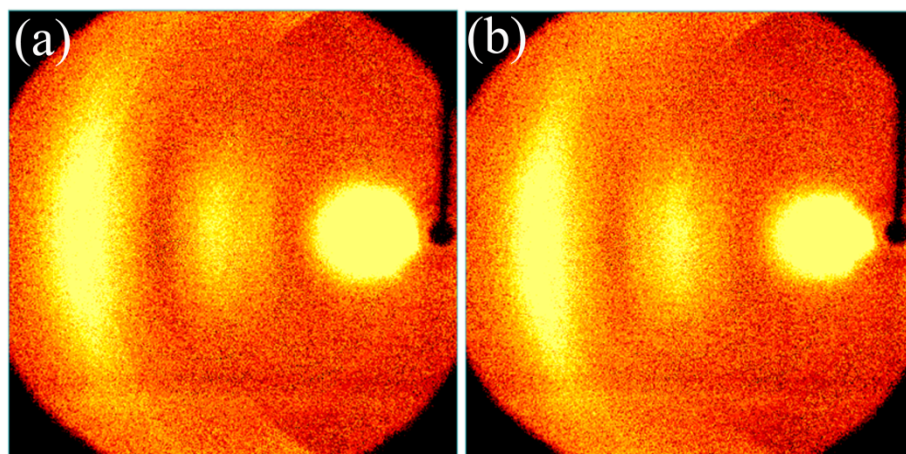

**Fig. S7** 2D WAXD patterns of (a) D-clay film, (b) D-clay/Fe<sup>3+</sup> film.

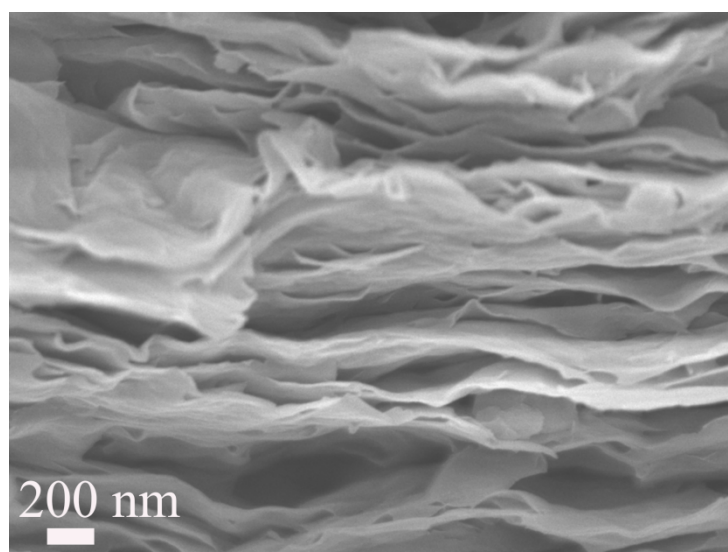

**Fig. S8** A FESEM image of DI water-treated D-clay film.

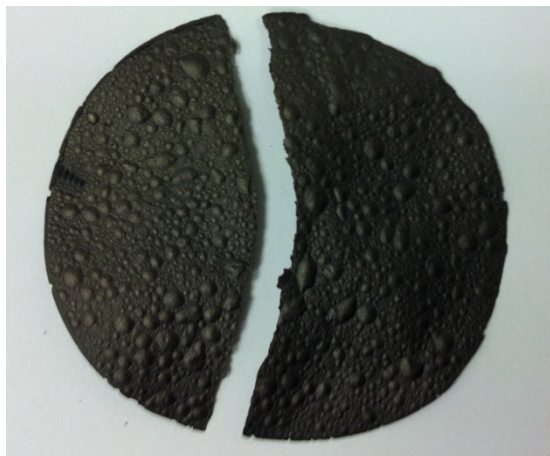

**Fig. S9** Photograph of the burnt D-clay film after bending.

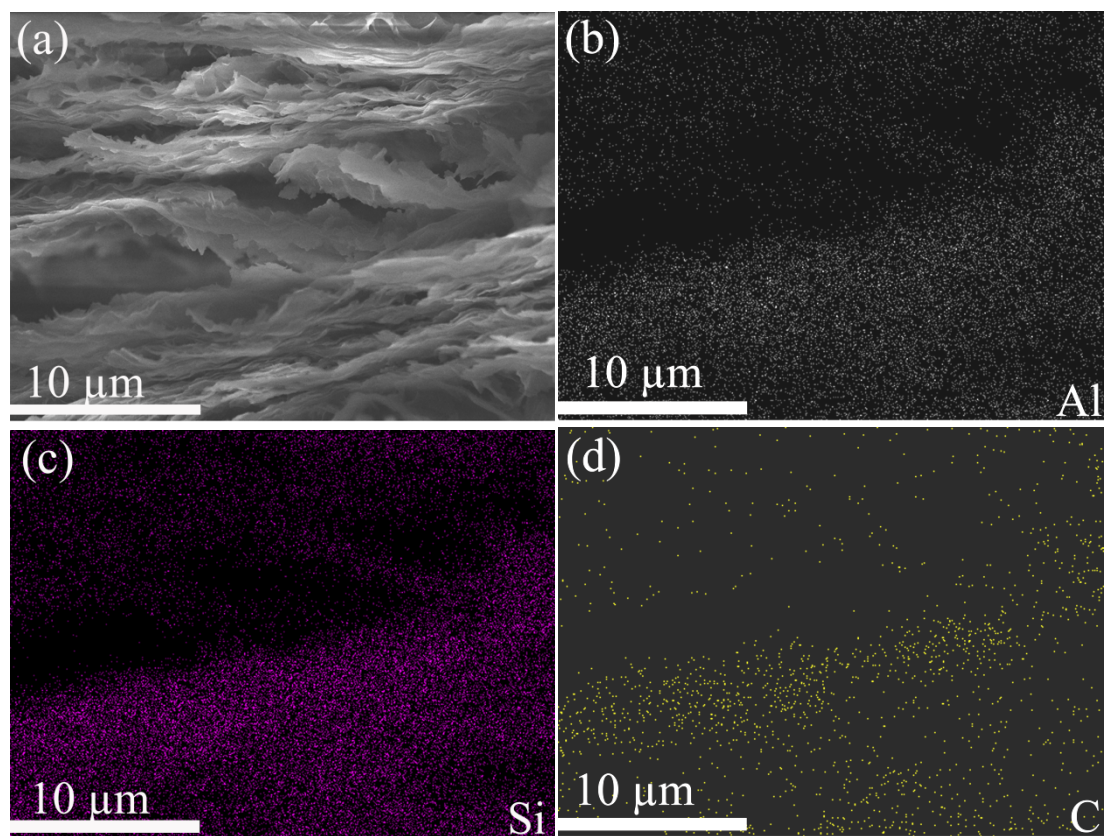

**Fig. S10** (a) Cross-section FESEM image of D-clay film after flame treatment, and (b-d) the corresponding EDX elemental mappings of Al, Si and C, respectively.

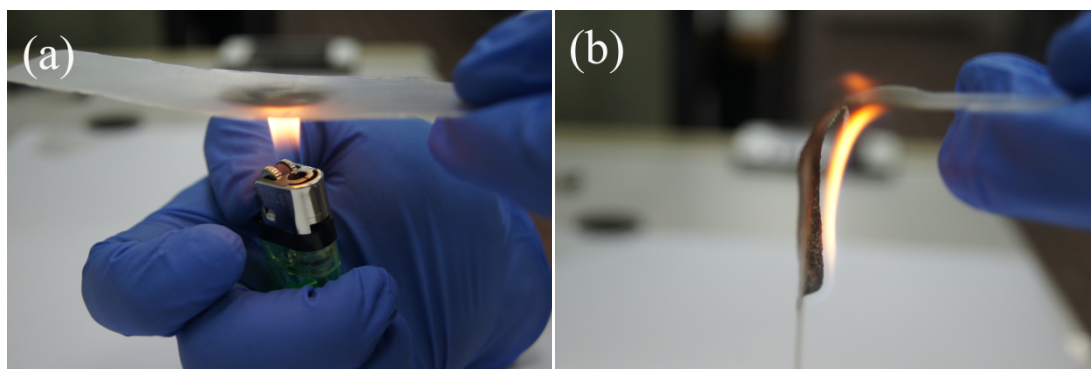

**Fig. S11** (a) Pure PMMA film (a) was exposed to open flame and (b) started to burn after 12 seconds.
